# Supplementary material
Source: PubMed Central journal article supplement (PMC2917543)
Supplement: NIHMS223699-supplement-1.pdf [file NIHMS223699-supplement-1.pdf]

**Supplementary Figure 1.** Resolution of closely spaced peaks by QuEST.

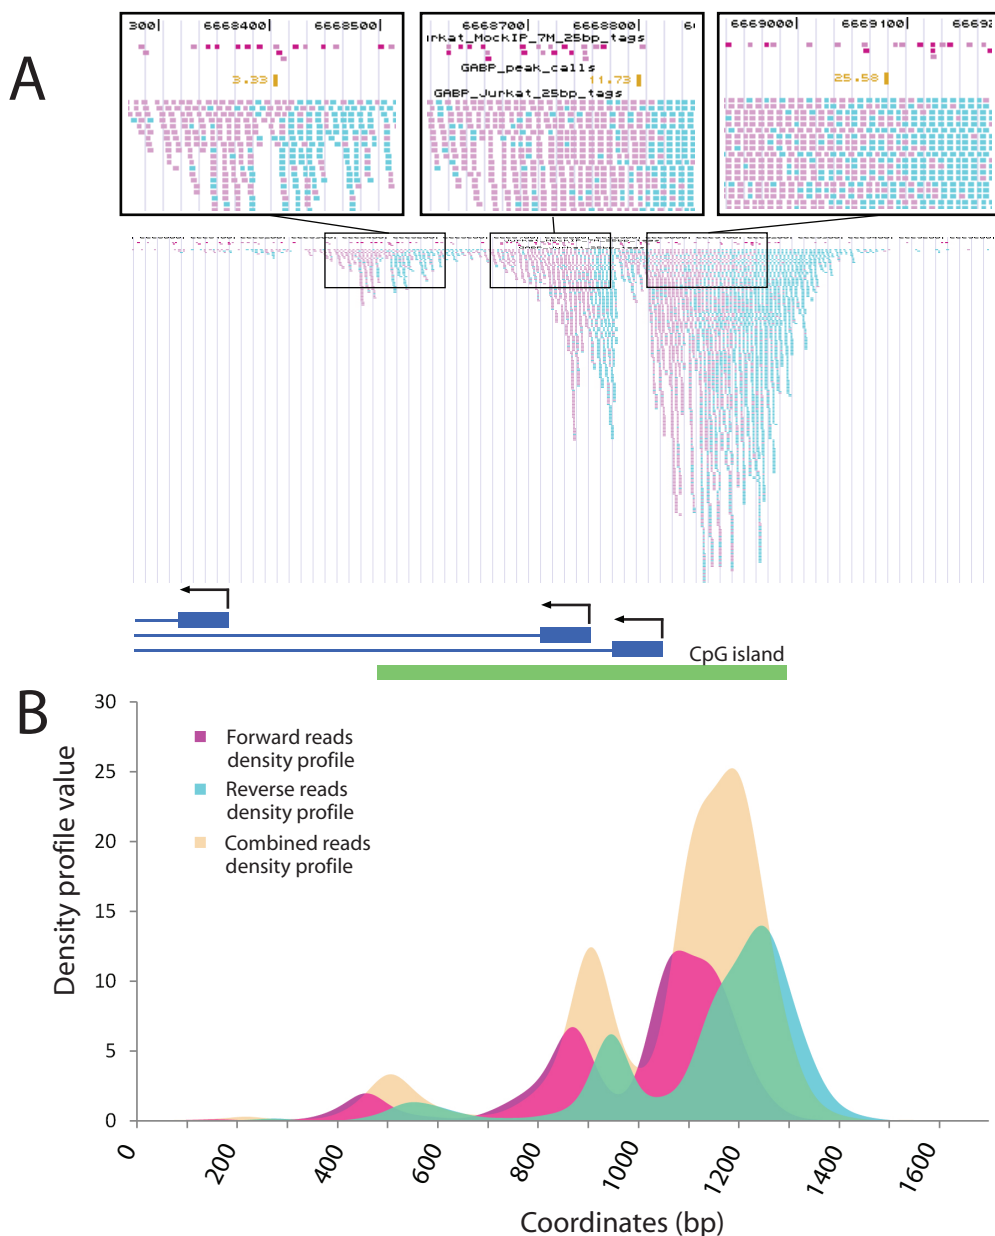

**(A)** GABP ChIP-Seq reads, RX-noIP reads and peak calls at the promoter of Nuclear Matrix Transcription Factor 4 gene (ZNF384). GABP ChIP forward reads (purple) and reverse reads (blue) are displayed as small bands 5 bp in width. Three portions of the browser are magnified to show the relatively sparse number of reads in the RX-noIP track (top) and the GABP peak calling track with the peak score values and positions (displayed as small yellow bands). Shown below the sequencing data are three first exons of distinct human transcripts that originate in the region. **(B)** The forward (purple), reverse (blue), and combined (yellow) density profiles derived from these data illustrate that the three peaks are cleanly separated by QuEST, and that the heights of the peaks quantify enrichment of the ChIP tags. The zero coordinate of the graph corresponds to position 6667900 of Chromosome 12, NCBI build 36.

**Supplementary Figure 2.** QuEST analysis outline.

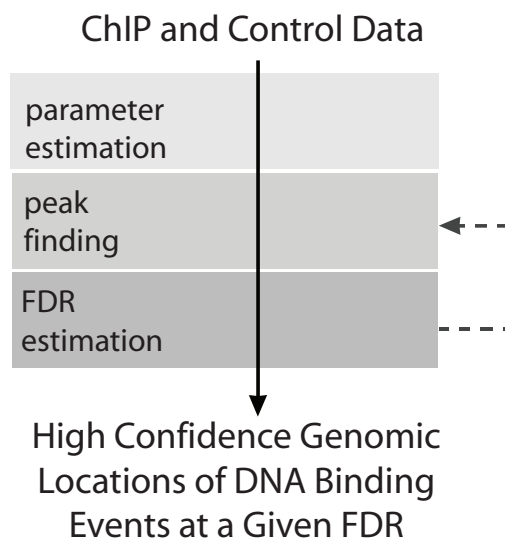

High-throughput sequencing data from ChIP and RX-noIP libraries are used to first estimate experiment-specific statistical parameters and then to perform peak calling. ChIP peak calls and pseudo-ChIP peak calls together provide an estimate of the false discovery rate. Peak calling can be repeated with varying thresholds until the desired FDR is achieved (dashed arrow).

**Supplementary Figure 3.** Peak saturation curves at 1% FDR.

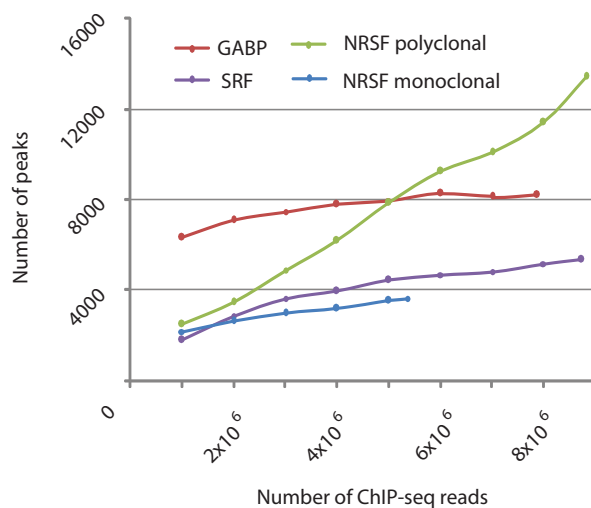

For each of the four datasets, the number of peak calls as a function of the number of ChIP-Seq reads that were used to perform peak finding, is plotted (See Supplemental Methods for details).

**Supplementary Figure 4. MAST curves.**

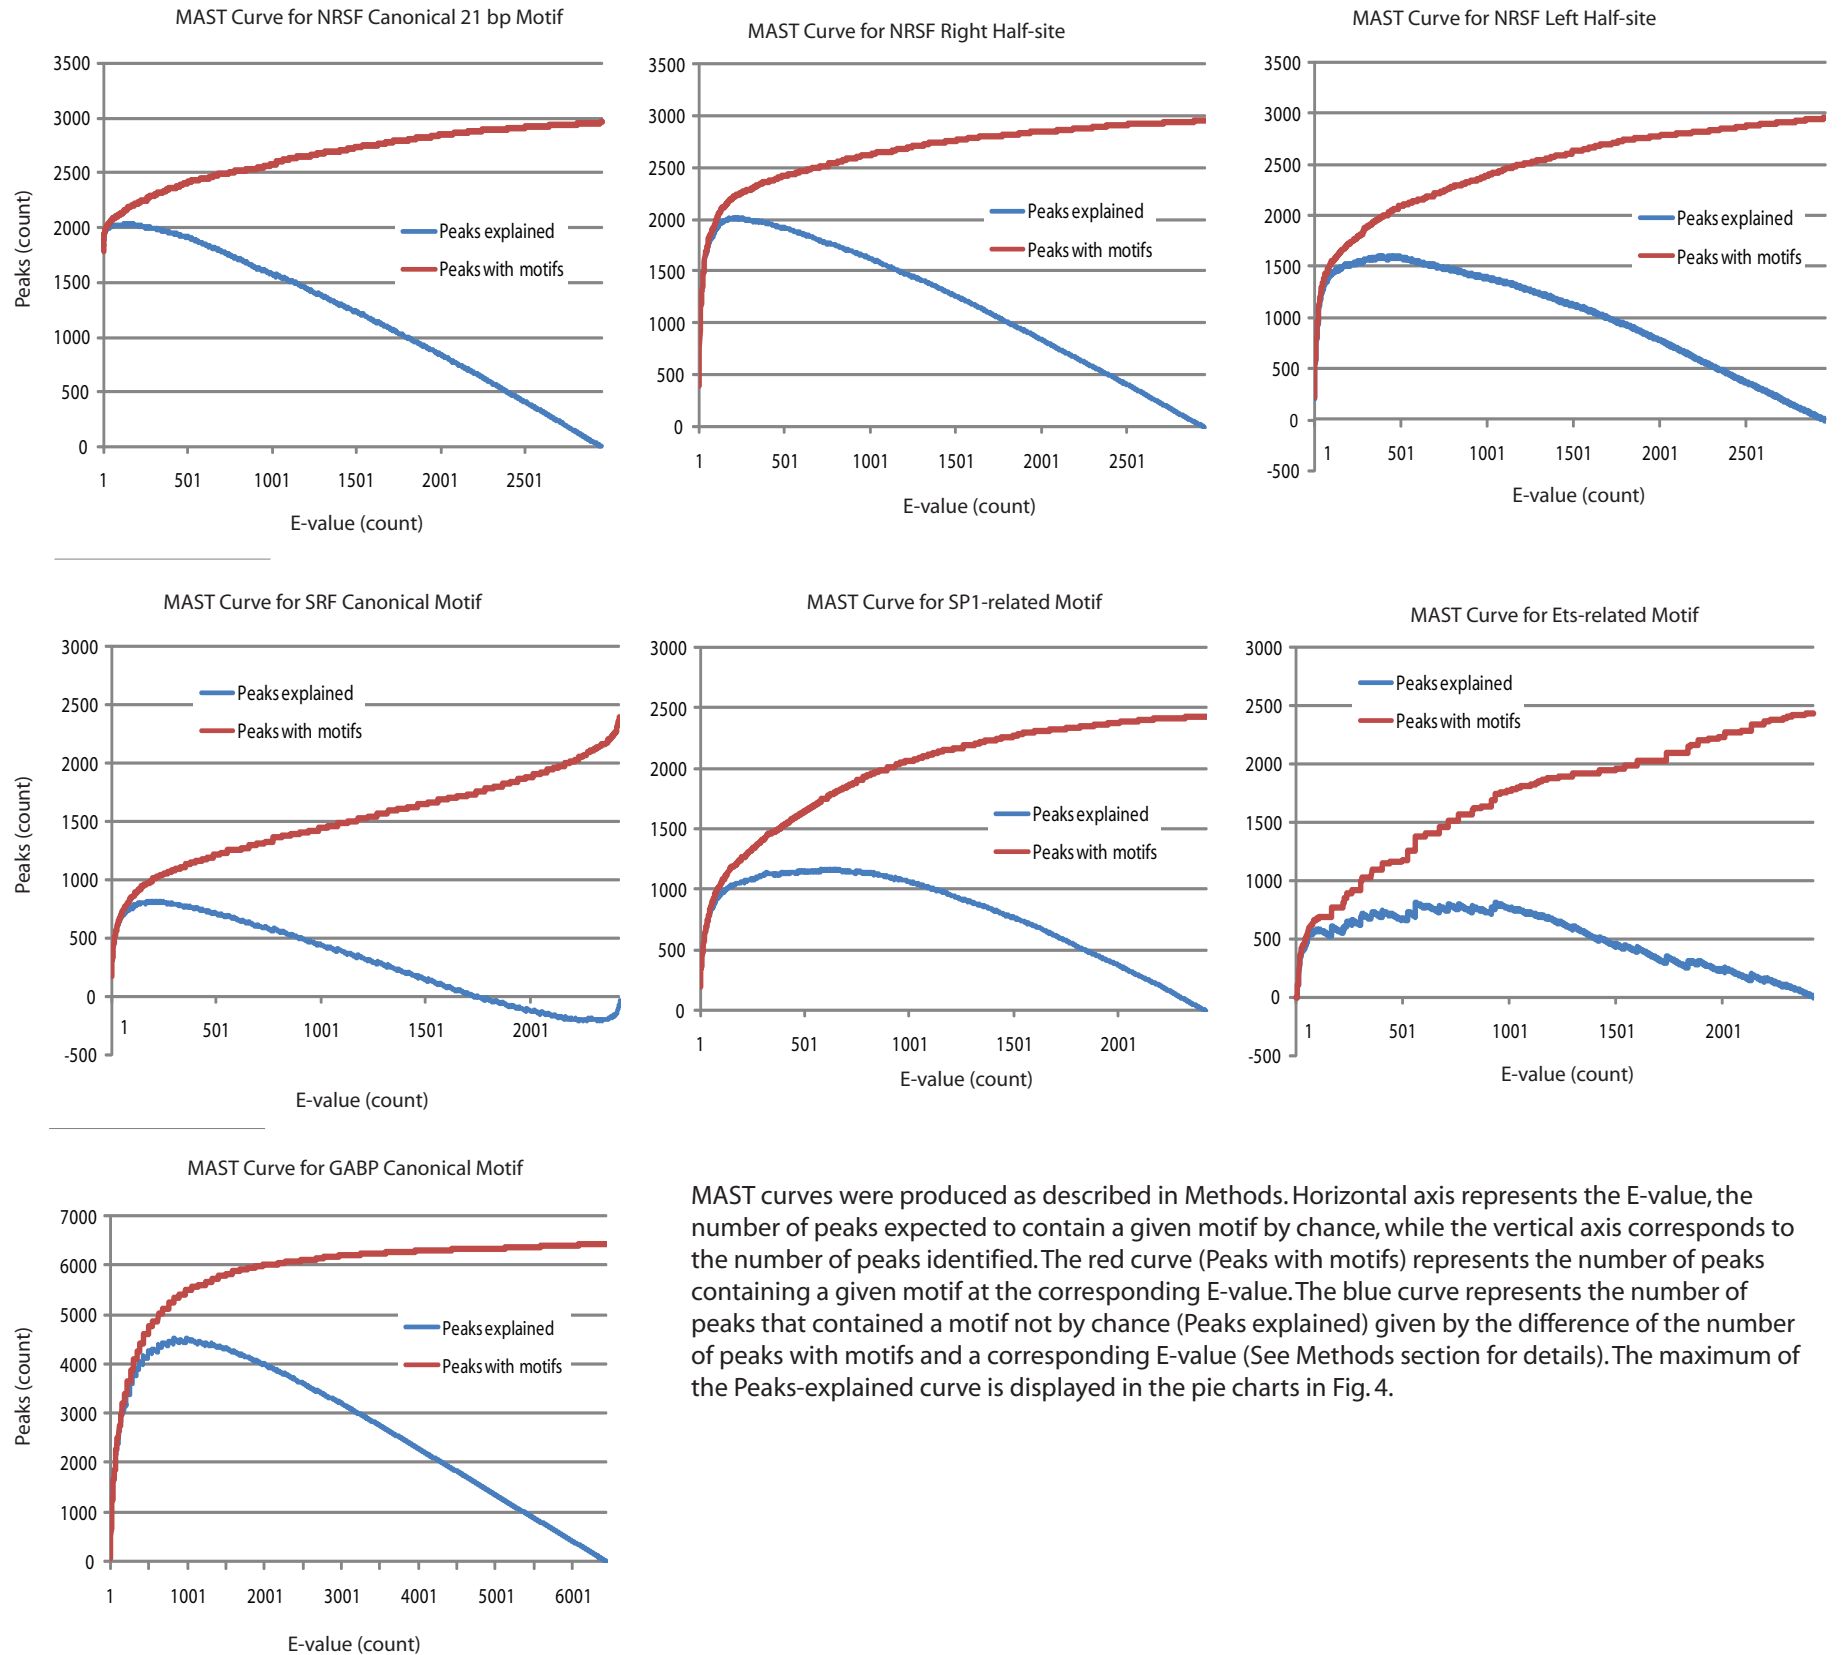

MAST curves were produced as described in Methods. Horizontal axis represents the E-value, the number of peaks expected to contain a given motif by chance, while the vertical axis corresponds to the number of peaks identified. The red curve (Peaks with motifs) represents the number of peaks containing a given motif at the corresponding E-value. The blue curve represents the number of peaks that contained a motif not by chance (Peaks explained) given by the difference of the number of peaks with motifs and a corresponding E-value (See Methods section for details). The maximum of the Peaks-explained curve is displayed in the pie charts in Fig. 4.

### Supplementary Figure 5. Expression analysis of peak-associated genes.

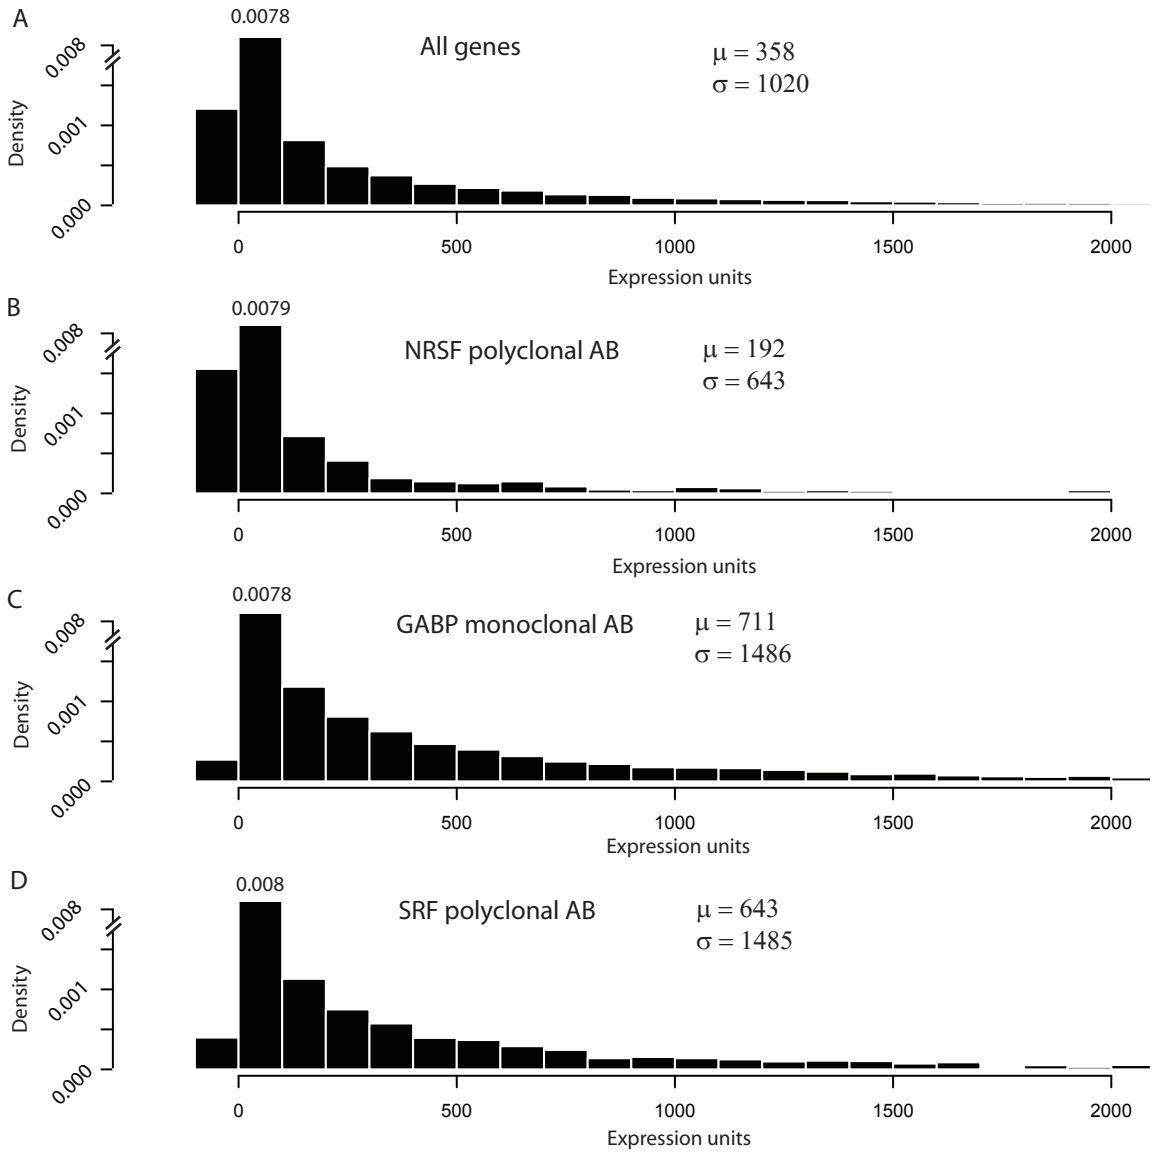

Panels display distributions of expression values from an Illumina expression BeadArray, and their mean and standard deviations. (A), distribution of all genes assayed on the array. (B) - (D), distributions of genes associated with the indicated factors.

**Supplementary Figure 6. Distribution of peak distances between forward and reverse KDE profiles.**

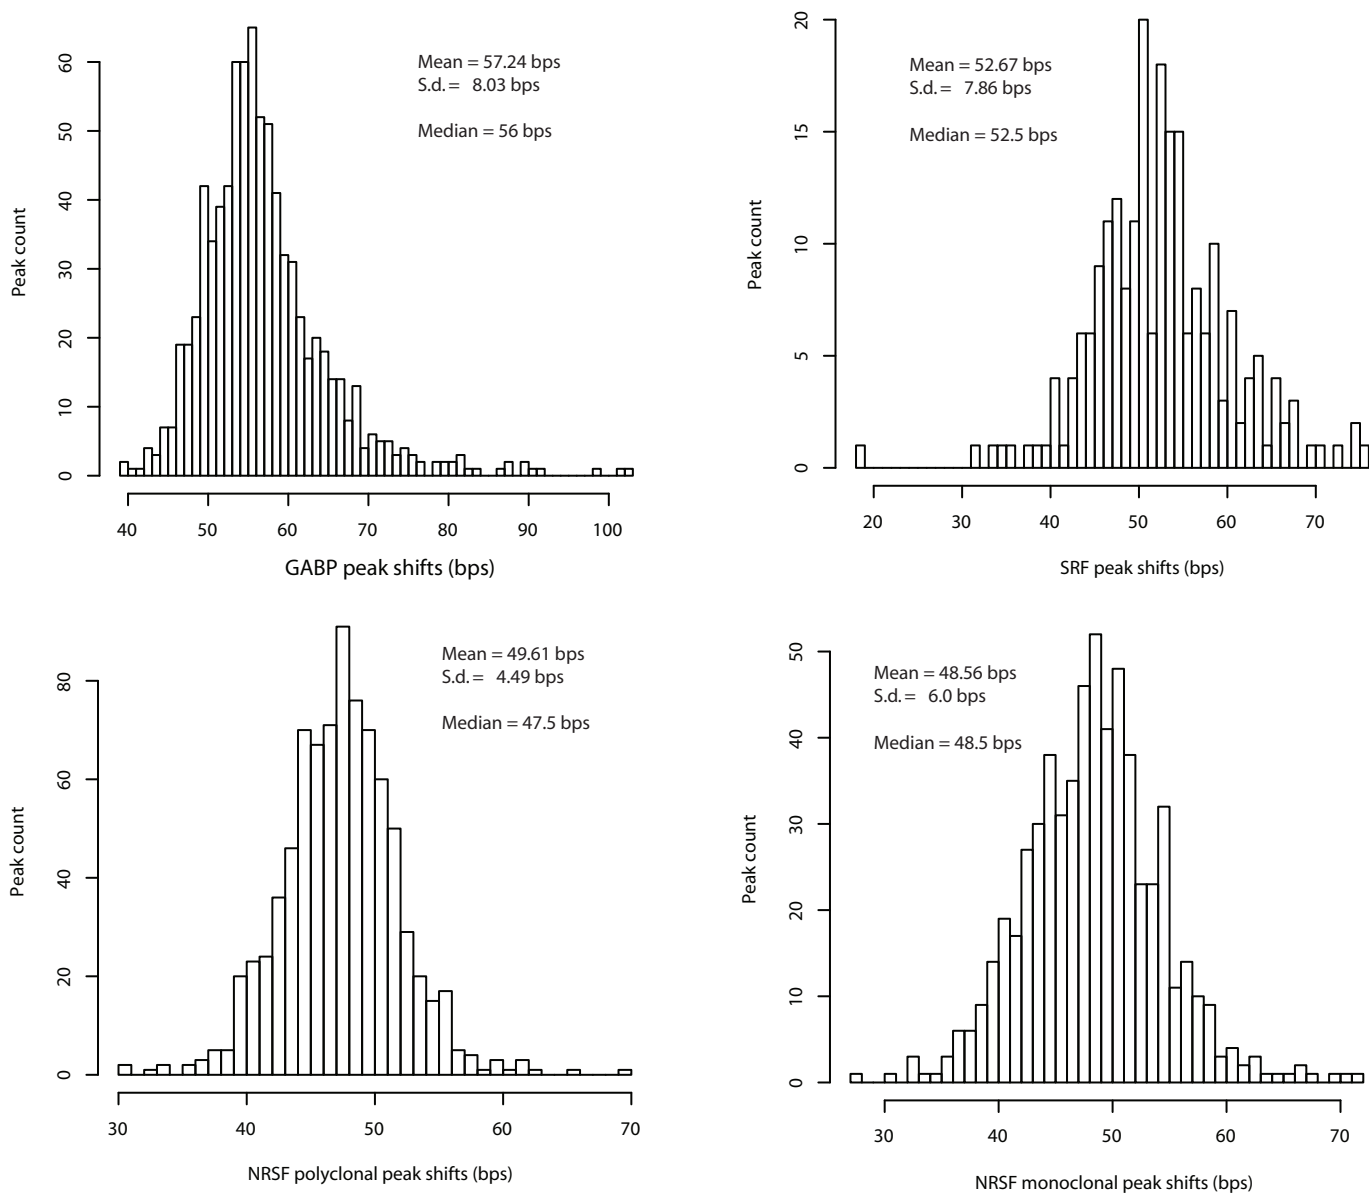

Peak distances identified from a core set of enriched regions (described in Methods, Peak Shift Estimate section) are displayed as histograms for each dataset. The peak shift estimate (either mean or median) is robust across all 4 of analyzed ChIP datasets and is highly concordant between two NRSF experiments.

**Supplementary Table 1. GABP GO categories.**

| GO group   | Instances        | p-value   |          | Annotation                                           |
|------------|------------------|-----------|----------|------------------------------------------------------|
| GO:0005634 | 1493 out of 4085 | 1.21E-240 | enriched | nucleus                                              |
| GO:0005515 | 1239 out of 4063 | 1.87E-120 | enriched | protein binding                                      |
| GO:0006350 | 517 out of 1370  | 2.03E-80  | enriched | transcription                                        |
| GO:0000166 | 587 out of 1671  | 1.13E-77  | enriched | nucleotide binding                                   |
| GO:0046872 | 691 out of 2155  | 9.06E-73  | enriched | metal ion binding                                    |
| GO:0003723 | 266 out of 543   | 4.19E-68  | enriched | RNA binding                                          |
| GO:0005622 | 681 out of 2169  | 1.60E-67  | enriched | intracellular                                        |
| GO:0003677 | 439 out of 1184  | 2.35E-65  | enriched | DNA binding                                          |
| GO:0008270 | 688 out of 2240  | 5.12E-64  | enriched | zinc ion binding                                     |
| GO:0005739 | 320 out of 759   | 2.98E-62  | enriched | mitochondrion                                        |
| GO:0005737 | 525 out of 1564  | 1.02E-61  | enriched | cytoplasm                                            |
| GO:0008380 | 130 out of 196   | 9.15E-54  | enriched | RNA splicing                                         |
| GO:0005524 | 446 out of 1352  | 6.41E-50  | enriched | ATP binding                                          |
| GO:0006355 | 538 out of 1818  | 3.17E-44  | enriched | regulation of transcription, DNA-dependent           |
| GO:0005681 | 86 out of 118    | 4.45E-41  | enriched | spliceosome complex                                  |
| GO:0016740 | 368 out of 1120  | 9.85E-41  | enriched | transferase activity                                 |
| GO:0006397 | 106 out of 178   | 9.91E-38  | enriched | mRNA processing                                      |
| GO:0015031 | 148 out of 314   | 6.86E-36  | enriched | protein transport                                    |
| GO:0007186 | 30 out of 817    | 4.71E-33  | depleted | G-protein coupled receptor protein signaling pathway |
| GO:0006512 | 154 out of 356   | 5.68E-32  | enriched | ubiquitin cycle                                      |
| GO:0005783 | 221 out of 638   | 2.60E-28  | enriched | endoplasmic reticulum                                |
| GO:0006281 | 84 out of 148    | 3.85E-28  | enriched | DNA repair                                           |
| GO:0016787 | 270 out of 864   | 2.71E-26  | enriched | hydrolase activity                                   |
| GO:0007608 | 4 out of 392     | 3.26E-26  | depleted | sensory perception of smell                          |
| GO:0004872 | 106 out of 1407  | 3.49E-26  | depleted | receptor activity                                    |
| GO:0007049 | 165 out of 439   | 8.37E-26  | enriched | cell cycle                                           |
| GO:0006457 | 112 out of 247   | 9.78E-26  | enriched | protein folding                                      |
| GO:0005730 | 67 out of 115    | 1.23E-23  | enriched | nucleolus                                            |
| GO:0030529 | 62 out of 108    | 1.60E-21  | enriched | ribonucleoprotein complex                            |
| GO:0003676 | 237 out of 786   | 5.23E-21  | enriched | nucleic acid binding                                 |
| GO:0050896 | 23 out of 550    | 1.10E-20  | depleted | response to stimulus                                 |
| GO:0005576 | 36 out of 681    | 1.11E-20  | depleted | extracellular region                                 |
| GO:0006412 | 136 out of 391   | 3.61E-18  | enriched | protein biosynthesis                                 |
| GO:0016874 | 97 out of 242    | 5.71E-18  | enriched | ligase activity                                      |
| GO:0005842 | 31 out of 40     | 5.52E-17  | enriched | cytosolic large ribosomal subunit (sensu Eukaryota)  |
| GO:0005654 | 46 out of 79     | 1.10E-16  | enriched | nucleoplasm                                          |
| GO:0006888 | 43 out of 71     | 1.43E-16  | enriched | ER to Golgi vesicle-mediated transport               |
| GO:0006364 | 34 out of 49     | 5.01E-16  | enriched | rRNA processing                                      |

|            |                |          |          |                                                             |
|------------|----------------|----------|----------|-------------------------------------------------------------|
| GO:0003674 | 184 out of 621 | 7.69E-16 | enriched | molecular_function                                          |
| GO:0006260 | 55 out of 112  | 2.88E-15 | enriched | DNA replication                                             |
| GO:0005843 | 27 out of 35   | 7.15E-15 | enriched | cytosolic small ribosomal subunit (sensu Eukaryota)         |
| GO:0006464 | 88 out of 242  | 1.46E-13 | enriched | protein modification                                        |
| GO:0051082 | 52 out of 113  | 4.16E-13 | enriched | unfolded protein binding                                    |
| GO:0003684 | 27 out of 39   | 5.68E-13 | enriched | damaged DNA binding                                         |
| GO:0006886 | 68 out of 171  | 6.78E-13 | enriched | intracellular protein transport                             |
| GO:0003735 | 110 out of 340 | 1.09E-12 | enriched | structural constituent of ribosome                          |
| GO:0016301 | 74 out of 196  | 1.42E-12 | enriched | kinase activity                                             |
| GO:0051301 | 68 out of 174  | 1.75E-12 | enriched | cell division                                               |
| GO:0000398 | 25 out of 36   | 3.71E-12 | enriched | nuclear mRNA splicing, via spliceosome                      |
| GO:0006915 | 104 out of 321 | 3.94E-12 | enriched | apoptosis                                                   |
| GO:0006511 | 58 out of 140  | 4.34E-12 | enriched | ubiquitin-dependent protein catabolism                      |
| GO:0006468 | 151 out of 528 | 5.20E-12 | enriched | protein amino acid phosphorylation                          |
| GO:0001584 | 11 out of 280  | 1.12E-11 | depleted | rhodopsin-like receptor activity                            |
| GO:0006310 | 28 out of 46   | 2.28E-11 | enriched | DNA recombination                                           |
| GO:0005488 | 110 out of 356 | 2.53E-11 | enriched | binding                                                     |
| GO:0008168 | 43 out of 93   | 3.42E-11 | enriched | methyltransferase activity                                  |
| GO:0005793 | 22 out of 31   | 3.77E-11 | enriched | ER-Golgi intermediate compartment                           |
| GO:0004674 | 111 out of 363 | 4.13E-11 | enriched | protein serine/threonine kinase activity                    |
| GO:0008150 | 173 out of 645 | 4.79E-11 | enriched | biological_process                                          |
| GO:0008033 | 27 out of 45   | 8.26E-11 | enriched | tRNA processing                                             |
| GO:0005525 | 114 out of 381 | 9.77E-11 | enriched | GTP binding                                                 |
| GO:0005829 | 101 out of 325 | 1.09E-10 | enriched | cytosol                                                     |
| GO:0042802 | 62 out of 166  | 1.40E-10 | enriched | protein self binding                                        |
| GO:0003899 | 24 out of 38   | 2.04E-10 | enriched | DNA-directed RNA polymerase activity                        |
| GO:0017111 | 38 out of 81   | 2.70E-10 | enriched | nucleoside-triphosphatase activity                          |
| GO:0005743 | 54 out of 138  | 2.84E-10 | enriched | mitochondrial inner membrane                                |
| GO:0004842 | 51 out of 128  | 4.12E-10 | enriched | ubiquitin-protein ligase activity                           |
| GO:0031202 | 17 out of 22   | 7.60E-10 | enriched | RNA splicing factor activity, transesterification mechanism |
| GO:0003713 | 58 out of 157  | 8.48E-10 | enriched | transcription coactivator activity                          |
| GO:0003743 | 32 out of 65   | 1.48E-09 | enriched | translation initiation factor activity                      |
| GO:0005840 | 85 out of 271  | 1.78E-09 | enriched | ribosome                                                    |
| GO:0005643 | 29 out of 57   | 3.25E-09 | enriched | nuclear pore                                                |
| GO:0000502 | 15 out of 19   | 4.74E-09 | enriched | proteasome complex (sensu Eukaryota)                        |
| GO:0016853 | 44 out of 110  | 5.28E-09 | enriched | isomerase activity                                          |
| GO:0005575 | 183 out of 737 | 7.82E-09 | enriched | cellular_component                                          |
| GO:0008026 | 30 out of 62   | 7.84E-09 | enriched | ATP-dependent helicase activity                             |
| GO:0016568 | 43 out of 108  | 9.15E-09 | enriched | chromatin modification                                      |
| GO:0000151 | 26 out of 50   | 1.15E-08 | enriched | ubiquitin ligase complex                                    |
| GO:0005789 | 29 out of 60   | 1.42E-08 | enriched | endoplasmic reticulum membrane                              |



|            |                 |          |          |                                                         |
|------------|-----------------|----------|----------|---------------------------------------------------------|
| GO:0003924 | 66 out of 201   | 1.45E-08 | enriched | GTPase activity                                         |
| GO:0006366 | 62 out of 186   | 2.06E-08 | enriched | transcription from RNA polymerase II promoter           |
| GO:0003697 | 22 out of 39    | 2.18E-08 | enriched | single-stranded DNA binding                             |
| GO:0007165 | 216 out of 1734 | 2.75E-08 | depleted | signal transduction                                     |
| GO:0016567 | 24 out of 46    | 3.81E-08 | enriched | protein ubiquitination                                  |
| GO:0007264 | 67 out of 210   | 3.90E-08 | enriched | small GTPase mediated signal transduction               |
| GO:0000074 | 71 out of 230   | 6.73E-08 | enriched | regulation of progression through cell cycle            |
| GO:0008565 | 30 out of 68    | 1.03E-07 | enriched | protein transporter activity                            |
| GO:0007067 | 47 out of 133   | 1.37E-07 | enriched | mitosis                                                 |
| GO:0005615 | 41 out of 467   | 1.45E-07 | depleted | extracellular space                                     |
| GO:0006396 | 25 out of 52    | 1.54E-07 | enriched | RNA processing                                          |
| GO:0005096 | 48 out of 138   | 1.74E-07 | enriched | GTPase activator activity                               |
| GO:0005777 | 34 out of 84    | 1.87E-07 | enriched | peroxisome                                              |
| GO:0004004 | 14 out of 20    | 1.94E-07 | enriched | ATP-dependent RNA helicase activity                     |
| GO:0006506 | 14 out of 20    | 1.94E-07 | enriched | GPI anchor biosynthesis                                 |
| GO:0006461 | 42 out of 115   | 2.19E-07 | enriched | protein complex assembly                                |
| GO:0003954 | 20 out of 37    | 2.40E-07 | enriched | NADH dehydrogenase activity                             |
| GO:0004519 | 25 out of 53    | 2.43E-07 | enriched | endonuclease activity                                   |
| GO:0000781 | 12 out of 16    | 4.64E-07 | enriched | chromosome, telomeric region                            |
| GO:0016251 | 14 out of 21    | 4.85E-07 | enriched | general RNA polymerase II transcription factor activity |
| GO:0003700 | 212 out of 933  | 6.58E-07 | enriched | transcription factor activity                           |
| GO:0048471 | 24 out of 52    | 6.81E-07 | enriched | perinuclear region                                      |
| GO:0005794 | 59 out of 191   | 7.37E-07 | enriched | Golgi apparatus                                         |
| GO:0019901 | 23 out of 49    | 8.00E-07 | enriched | protein kinase binding                                  |
| GO:0016564 | 33 out of 86    | 1.13E-06 | enriched | transcriptional repressor activity                      |
| GO:0000287 | 93 out of 350   | 1.42E-06 | enriched | magnesium ion binding                                   |
| GO:0006446 | 17 out of 31    | 1.45E-06 | enriched | regulation of translational initiation                  |

**Supplementary Table 2. SRF GO categories.**

| GO group   | Instances       | p-value  |          | Annotation                                           |
|------------|-----------------|----------|----------|------------------------------------------------------|
| GO:0005634 | 515 out of 4085 | 5.18E-70 | enriched | nucleus                                              |
| GO:0005515 | 467 out of 4063 | 2.16E-50 | enriched | protein binding                                      |
| GO:0005737 | 202 out of 1564 | 6.67E-27 | enriched | cytoplasm                                            |
| GO:0006350 | 183 out of 1370 | 4.13E-26 | enriched | transcription                                        |
| GO:0000166 | 203 out of 1671 | 1.04E-23 | enriched | nucleotide binding                                   |
| GO:0046872 | 239 out of 2155 | 1.92E-22 | enriched | metal ion binding                                    |
| GO:0008270 | 238 out of 2240 | 5.76E-20 | enriched | zinc ion binding                                     |
| GO:0003723 | 88 out of 543   | 3.38E-18 | enriched | RNA binding                                          |
| GO:0006355 | 191 out of 1818 | 1.15E-15 | enriched | regulation of transcription, DNA-dependent           |
| GO:0005524 | 152 out of 1352 | 4.84E-15 | enriched | ATP binding                                          |
| GO:0005622 | 211 out of 2169 | 8.63E-14 | enriched | intracellular                                        |
| GO:0005739 | 96 out of 759   | 7.94E-13 | enriched | mitochondrion                                        |
| GO:0016740 | 125 out of 1120 | 2.17E-12 | enriched | transferase activity                                 |
| GO:0003677 | 130 out of 1184 | 2.44E-12 | enriched | DNA binding                                          |
| GO:0015031 | 51 out of 314   | 3.18E-11 | enriched | protein transport                                    |
| GO:0007186 | 12 out of 817   | 1.15E-10 | depleted | G-protein coupled receptor protein signaling pathway |
| GO:0005681 | 28 out of 118   | 1.43E-10 | enriched | spliceosome complex                                  |
| GO:0006397 | 35 out of 178   | 2.04E-10 | enriched | mRNA processing                                      |
| GO:0008380 | 36 out of 196   | 7.95E-10 | enriched | RNA splicing                                         |
| GO:0003700 | 101 out of 933  | 1.34E-09 | enriched | transcription factor activity                        |
| GO:0006281 | 30 out of 148   | 1.80E-09 | enriched | DNA repair                                           |
| GO:0005783 | 74 out of 638   | 1.21E-08 | enriched | endoplasmic reticulum                                |
| GO:0006928 | 26 out of 127   | 1.67E-08 | enriched | cell motility                                        |
| GO:0006468 | 64 out of 528   | 2.20E-08 | enriched | protein amino acid phosphorylation                   |
| GO:0007049 | 56 out of 439   | 2.86E-08 | enriched | cell cycle                                           |
| GO:0005856 | 47 out of 340   | 3.20E-08 | enriched | cytoskeleton                                         |
| GO:0016874 | 36 out of 242   | 1.99E-07 | enriched | ligase activity                                      |
| GO:0003779 | 36 out of 244   | 2.42E-07 | enriched | actin binding                                        |
| GO:0007265 | 12 out of 34    | 2.47E-07 | enriched | Ras protein signal transduction                      |
| GO:0050896 | 9 out of 550    | 4.60E-07 | depleted | response to stimulus                                 |
| GO:0004674 | 46 out of 363   | 5.27E-07 | enriched | protein serine/threonine kinase activity             |
| GO:0008134 | 18 out of 82    | 8.42E-07 | enriched | transcription factor binding                         |
| GO:0016568 | 21 out of 108   | 8.86E-07 | enriched | chromatin modification                               |
| GO:0003714 | 21 out of 110   | 1.20E-06 | enriched | transcription corepressor activity                   |
| GO:0030036 | 19 out of 94    | 1.56E-06 | enriched | actin cytoskeleton organization and biogenesis       |
| GO:0005576 | 15 out of 681   | 1.64E-06 | depleted | extracellular region                                 |

**Supplementary Table 3. NRSF GO categories.**

| GO group   | Instances       | p-value  |          | Annotation                               |
|------------|-----------------|----------|----------|------------------------------------------|
| GO:0016020 | 364 out of 4640 | 1.33E-43 | enriched | membrane                                 |
| GO:0006811 | 89 out of 461   | 9.35E-37 | enriched | ion transport                            |
| GO:0005509 | 117 out of 897  | 4.27E-31 | enriched | calcium ion binding                      |
| GO:0007268 | 50 out of 178   | 4.45E-29 | enriched | synaptic transmission                    |
| GO:0016021 | 265 out of 3481 | 2.67E-28 | enriched | integral to membrane                     |
| GO:0005216 | 42 out of 183   | 5.82E-21 | enriched | ion channel activity                     |
| GO:0007399 | 53 out of 302   | 2.19E-20 | enriched | nervous system development               |
| GO:0030955 | 33 out of 116   | 7.49E-20 | enriched | potassium ion binding                    |
| GO:0006813 | 37 out of 153   | 1.87E-19 | enriched | potassium ion transport                  |
| GO:0005515 | 265 out of 4063 | 1.14E-18 | enriched | protein binding                          |
| GO:0045202 | 25 out of 80    | 1.85E-16 | enriched | synapse                                  |
| GO:0005887 | 98 out of 1048  | 5.79E-16 | enriched | integral to plasma membrane              |
| GO:0005886 | 66 out of 652   | 1.08E-12 | enriched | plasma membrane                          |
| GO:0007155 | 56 out of 514   | 3.16E-12 | enriched | cell adhesion                            |
| GO:0045211 | 21 out of 89    | 1.87E-11 | enriched | postsynaptic membrane                    |
| GO:0005249 | 19 out of 72    | 2.07E-11 | enriched | voltage-gated potassium channel activity |
| GO:0007411 | 16 out of 53    | 8.62E-11 | enriched | axon guidance                            |
| GO:0006816 | 19 out of 88    | 8.38E-10 | enriched | calcium ion transport                    |
| GO:0005245 | 10 out of 22    | 3.07E-09 | enriched | voltage-gated calcium channel activity   |
| GO:0008076 | 18 out of 87    | 4.71E-09 | enriched | voltage-gated potassium channel complex  |
| GO:0043025 | 11 out of 29    | 5.01E-09 | enriched | cell soma                                |
| GO:0000166 | 112 out of 1671 | 6.06E-09 | enriched | nucleotide binding                       |
| GO:0007165 | 115 out of 1734 | 6.72E-09 | enriched | signal transduction                      |
| GO:0005234 | 9 out of 19     | 1.23E-08 | enriched | glutamate-gated ion channel activity     |
| GO:0008021 | 13 out of 48    | 2.13E-08 | enriched | synaptic vesicle                         |
| GO:0005737 | 104 out of 1564 | 3.05E-08 | enriched | cytoplasm                                |
| GO:0007269 | 9 out of 21     | 3.62E-08 | enriched | neurotransmitter secretion               |
| GO:0006814 | 19 out of 111   | 4.45E-08 | enriched | sodium ion transport                     |
| GO:0005891 | 9 out of 22     | 5.88E-08 | enriched | voltage-gated calcium channel complex    |
| GO:0004872 | 94 out of 1407  | 1.10E-07 | enriched | receptor activity                        |
| GO:0005524 | 91 out of 1352  | 1.27E-07 | enriched | ATP binding                              |
| GO:0005215 | 34 out of 326   | 1.39E-07 | enriched | transporter activity                     |
| GO:0031402 | 16 out of 88    | 2.13E-07 | enriched | sodium ion binding                       |
| GO:0005624 | 43 out of 484   | 3.07E-07 | enriched | membrane fraction                        |
| GO:0005244 | 10 out of 37    | 9.17E-07 | enriched | voltage-gated ion channel activity       |
| GO:0019992 | 12 out of 56    | 1.12E-06 | enriched | diacylglycerol binding                   |
| GO:0030424 | 10 out of 38    | 1.20E-06 | enriched | axon                                     |
| GO:0030425 | 8 out of 23     | 1.39E-06 | enriched | dendrite                                 |

|            |               |          |          |                                            |
|------------|---------------|----------|----------|--------------------------------------------|
| GO:0005085 | 17 out of 113 | 1.40E-06 | enriched | guanyl-nucleotide exchange factor activity |
| GO:0006836 | 10 out of 39  | 1.55E-06 | enriched | neurotransmitter transport                 |

## Supplemental Methods

**Density Profiles** (1) Density profiles were defined as in Methods using the following

formula:  $H_{+/-}(i) = \frac{1}{h} \sum_{j=i-3h}^{i+3h} K((j-i)/h) \cdot C_{+/-}(j)$ . The sum in the expression for  $H$  is

limited to points within 3 times the KDE bandwidth,  $h$ , to improve computational performance. Points that are further away only contribute one percent or less compared to sample points occurring at positions where  $H$  is evaluated. We used  $h=30$  in all analyses. This choice was adopted after close inspection of a collection of enriched regions, in which optimal bandwidth was estimated using the statistical package R. Estimates varied between 6 to 9 bps depending on the region, but close visual inspection of the resulting density estimates at these loci revealed multiple sub-peaks within each region. These are likely due to biases in the ChIP, chromatin shearing, PCR or sequencing rather than biological phenomena. We therefore adjusted the bandwidth to a higher value until the profiles at these enriched regions appeared sufficiently smooth. We note that our analyses of the ChIP-Seq data in the paper did not apparently suffer in resolution and accuracy by this conservative adjustment of the KDE bandwidth.

**Two-step Motif Analysis.** As described in the manuscript, we ran the peak-associated sequences through MEME to discover motifs. Although MEME implements probabilistic subtraction allowing discovery of multiple motifs in the data, cofactor motifs may not be statistically significant unless a subset of data consisting of sequences free of canonical motifs is considered. We therefore conducted a second pass of MEME through the sequences that contained no strong evidence of a canonical motif, excluding sequences that contained motifs at a log-odds score of 3.0 (corresponding to uncorrected P-values between 0.0001 and 0.001) and above. We found this two-step strategy to be effective, as evidenced by the discovery of the Ets motif in the SRF dataset.

**Number of Sequence Reads Required to Achieve Peak Number Saturation.** A critical question for ChIP-Seq experiments in general and our datasets in particular is whether the number of reads produced in the experiment reached saturation, or whether more reads would have substantially increased the number of called peaks. To evaluate whether we sequenced our libraries to saturation, we performed QuEST analyses to identify significant peaks for each library on data subsets, which varied in size from 1 million reads to the total number in the experiment, in increments of 1 million. The background tag count was fixed at 7 million (Fig. S3; Methods), and the FDR at 1%. This resulting peak saturation curves exhibit an up to 50% gain in the number of identified peaks going from 1M to 4M reads (SRF, NRSF polyclonal) with a visible flattening at around 5M reads (SRF, GABP). The number of peaks for the NRSF polyclonal data increased linearly across the entire range without achieving flattening. This may be due to unspecific interactions between the polyclonal antibody and other

proteins, and suggests that peak saturation is experiment-specific and ideally should be evaluated for each experiment.

**Number of Peaks Explained by Motifs.** To determine how many peaks could be explained by statistically significant motifs, we estimated how many sequences had motifs that could be explained by chance. We first analyzed the peak-associated sequences for motif occurrences using the MEME PSSMs by counting the number of motif-containing sequences at various stringencies with the MEME tool MAST (Bailey TL and Gribskov M, *Bioinformatics* **14**:48-54, 1998).

MAST reports the number of motif containing sequences in the input set of sequences at a particular stringency. The stringency is given by an E-value, which is colloquially defined as the number of sequences expected to contain the motif by chance. The formal definition is “an estimate of the number of motifs (with the same width and number of occurrences) that would have equal or higher log likelihood ratio if the training set sequences had been generated randomly according to the (0-order portion of the) background model<sup>22</sup>”.

We first counted the number of motif-containing sequences across a range of E-values. As E-values increase, the number of predicted motifs increases (Supplementary Figure 4, red lines), due to increased sensitivity of the predictions. For any given E-value, we then calculated the fraction of peaks explained by that motif by subtracting the E-value from the total number of sequences containing the motif (at that same stringency). Applying this approach to a range of E-values, we obtained curves that plot the fraction of peaks explained by a motif at any given E-value (Supplementary Figure 4, blue lines). We then interpreted the maximum of this “MAST curve” as the maximum fraction of peaks that can be explained by that particular motif. This number is reported as a percentage of the total number of peaks in Fig. 4. In principle, this approach may yield an optimistic estimate of the explained peak fraction if the E-value estimate is noisy; we note, however, that MEME E-values have been demonstrated to be quite accurate<sup>22</sup> and therefore regard our estimate as a reasonably realistic approximation.

**Peak Saturation Analysis.** The peaks were identified using QuEST thresholds corresponding to 1% FDR. To do so, we used a rescue ratio of 10 and a background CDP threshold was chosen to correspond to 3 fold enrichment (i.e. if the ChIP CDP threshold is  $T$ , then the background CDP threshold is  $T$  times the number of background reads divided by three times the number of ChIP reads). Then, both ChIP CDP and background CDP thresholds were varied together until an FDR of 1% was achieved. Peaks were called using ChIP subsets of multiples of 1 million tags up to the full ChIP dataset. Background data contained 7M RX\_noIP reads (Fig. S3). The FDR estimate was provided using the same number of pseudo ChIP reads as in the corresponding subset of the ChIP data.

Our data sets provide some guidance as to how many reads are required to capture a sufficiently comprehensive set of peaks so as to approach saturation. We estimate that for the human genome, 5 - 10 million reads, or approximately two to six lanes of a Solexa run (depending on library quality and other parameters), is a good starting point (Fig. S3), but an evaluation of peak saturation curves may be necessary to assess whether the library was sequenced to sufficient depth. The cost of such experiments seems well worth the high data quality that ChIP-Seq produces.

**ChIP-Seq Library Construction and Sequencing.** The Jurkat human T lymphoblast cell line was cultured according to standard protocols (ATCC). NRSF/REST chromatin immunoprecipitation (ChIP) was performed as previously<sup>5</sup> with a custom monoclonal antibody and with a polyclonal antibody (Upstate AB15548). SRF ChIP was performed as described previously<sup>17</sup> using polyclonal antibody from Santa Cruz Biotechnology (sc-335), and GABP ChIP was performed as described elsewhere<sup>20</sup> using a monoclonal antibody from Santa Cruz (sc28312). For each ChIP, we collected 10-20 million cells and then added 1% formaldehyde to crosslink the proteins to the DNA. We then lysed and collected the nuclei and sonicated the chromatin to a final size of 500-1000 base pairs. We then coupled 5 $\mu$ L of each antibody to sheep anti-mouse magnetic beads (Invitrogen) by overnight incubation at 4°C in 5mg/ml BSA. We then added chromatin to the antibody-coupled beads and precipitated DNA-protein complexes overnight at 4°C. Four chromatin immunoprecipitations, corresponding to one batch of chromatin, were pooled for each library preparation. The control library input was chromatin that was reverse crosslinked, phenol extracted, and purified on a QIAQuick PCR cleanup column (Qiagen). The libraries were prepared as per Illumina's instructions ([www.illumina.com](http://www.illumina.com)), with some modifications. Briefly, the four ChIPs were blunted, phosphorylated, and then ligated to library adapters. We modified the protocol to include a PCR preamplification (30 sec at 98°C; [10 sec at 98°C, 30 sec at 65°C, 30 sec at 72°C] x 25 cycles; 5 min at 72°C) following adapter ligation. After this PCR amplification, size selection was performed by gel electrophoresis and subsequent excision and purification of DNA in the ~150-300bp range. Following gel extraction, a second PCR amplification was performed (30 sec at 98°C; [10 sec at 98°C, 30 sec at 65°C, 30 sec at 72°C] x 18 cycles; 5 min at 72°C). The control library was prepared in an identical manner, using ~50ng of input control DNA. These products were then sequenced on the Solexa 1G Genome Analyzer at 2-3pM concentration.

**Gene Expression.** Total RNA was prepared from three separate growths of Jurkat cells with Trizol (Invitrogen) according to manufacturer's protocols. Purity of the RNA was assessed by NanoDrop. RNA was amplified using standard procedures from the Illumina TotalPrep RNA amplification kit. We then used Illumina HumanRef-8 v2 Expression BeadChips for whole genome expression analysis on each of the biological replicates. Hybridization was performed using standard operating procedures from Illumina.

**References** are numbered according to the main text.
